# Supplementary material
Source: Springer Nature journal article supplement (https://www.springermedizin.de/resource/supplementary/12968_2013_3341_MOESM8_ESM.pdf/9583666)

**(a)****(b)****(c)**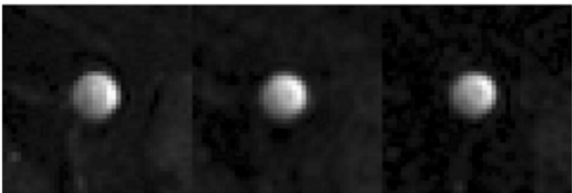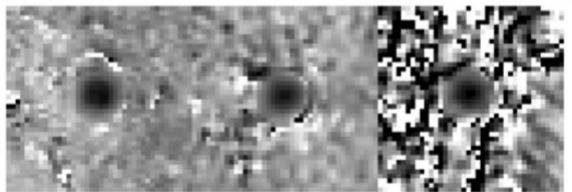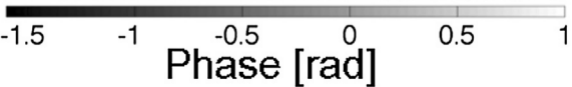

Supplement: MOESM8 [file 9583666]
